# Supplementary material for: Stepwise B-cell-dependent expansion of T helper clonotypes diversifies the T-cell response
Source: PubMed Central journal article supplement (PMC4728444; doi:10.1038/ncomms10281), 2016-01-05
Supplement: ncomms10281-s1.pdf [file ncomms10281-s1.pdf]

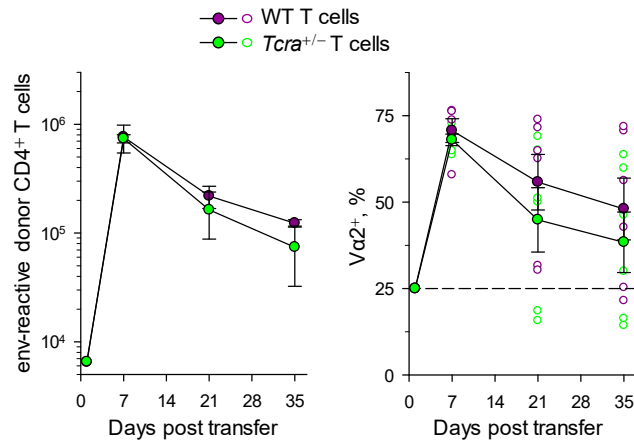

**Supplementary Figure 1. Clonal composition of WT or *Tcra*<sup>+/-</sup> virus-specific CD4<sup>+</sup> T cells.** Absolute numbers (left) and Vα composition (right) of CD45.1<sup>+</sup> WT or CD45.2<sup>+</sup> *Tcra*<sup>+/-</sup> env-reactive donor EF4.1 CD4<sup>+</sup> T cells in the spleens of CD45.1<sup>+</sup>CD45.2<sup>+</sup> WT recipients after cotransfer in equal numbers and FV infection (n=5-6 mice per time-point). Closed symbols are the means (±SEM); open symbols are individual mice.

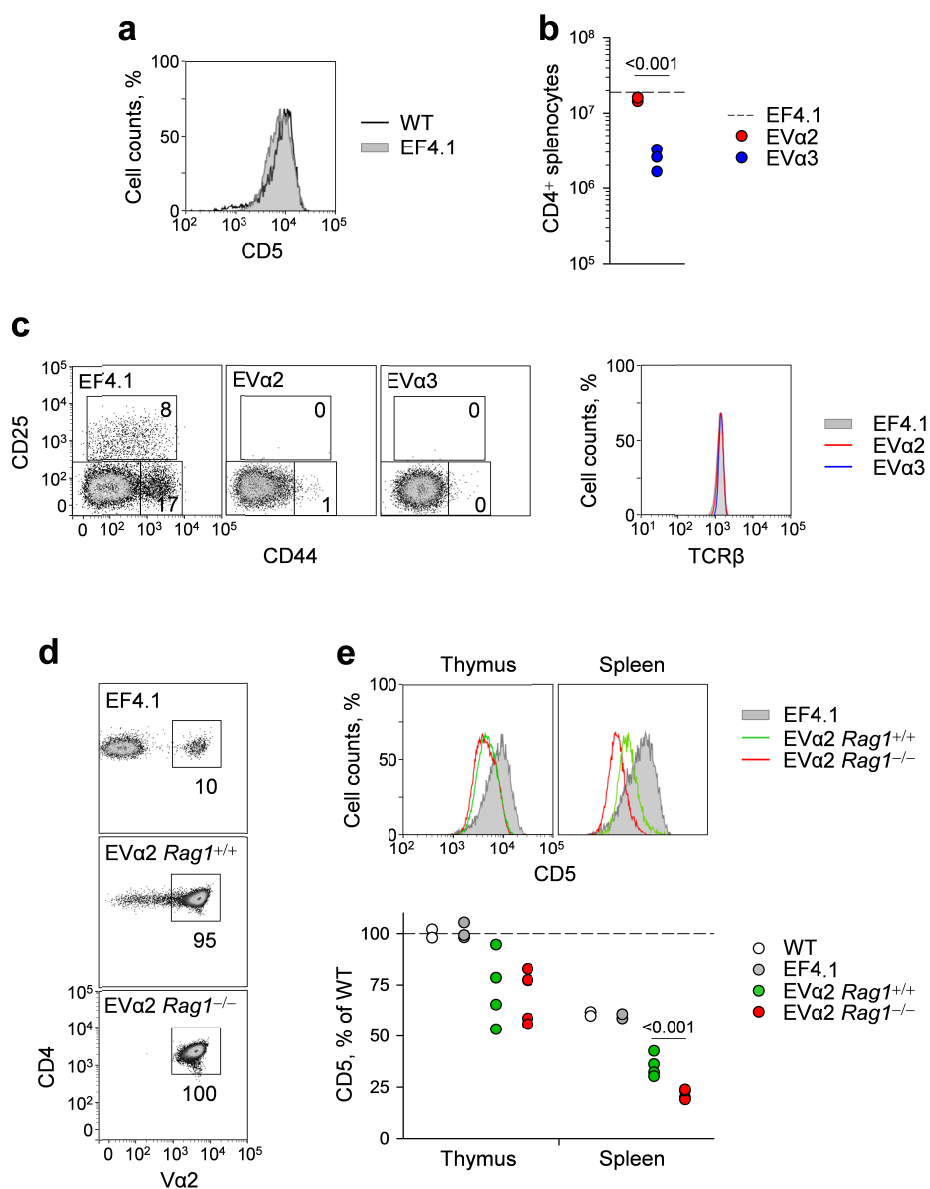

**Supplementary Figure 2. T cell development, maintenance and phenotype in EF4.1, EVα2 and EVα3 mice.** (a) CD5 levels in post-selection (CD4<sup>+</sup>CD8<sup>-</sup>) thymocytes from EF4.1 or WT mice. (b) Absolute number of splenic CD4<sup>+</sup> T cells from monoclinal (*Rag1*<sup>-/-</sup>) EVα2 and EVα3 mice. (c) CD44, CD25 and TCRβ expression in the same cells as in (b). (d) Vα2 expression in CD4<sup>+</sup>CD8<sup>-</sup>TCRβ<sup>hi</sup> thymocytes from EF4.1 mice or EVα2 mice either on a *Rag1*<sup>+/+</sup> (EVα2 *Rag1*<sup>+/+</sup>) or *Rag1*<sup>-/-</sup> genetic background (EVα2 *Rag1*<sup>-/-</sup>). (e) Flow cytometric examples of CD5 levels (top) and CD5 expression relative to WT levels (bottom) in post-selection (CD4<sup>+</sup>CD8<sup>-</sup>) thymocytes (Thymus) or splenic CD4<sup>+</sup> T cells (Spleen) from EF4.1, EVα2 *Rag1*<sup>+/+</sup> or EVα2 *Rag1*<sup>-/-</sup> mice. EVα2 *Rag1*<sup>+/+</sup> and EVα2 *Rag1*<sup>-/-</sup> T cells are gated as Vα2<sup>+</sup>. CD5 levels in thymic and splenic T cells are expressed as percentage of CD5 levels in WT thymocytes. Each symbol represents an individual mouse.

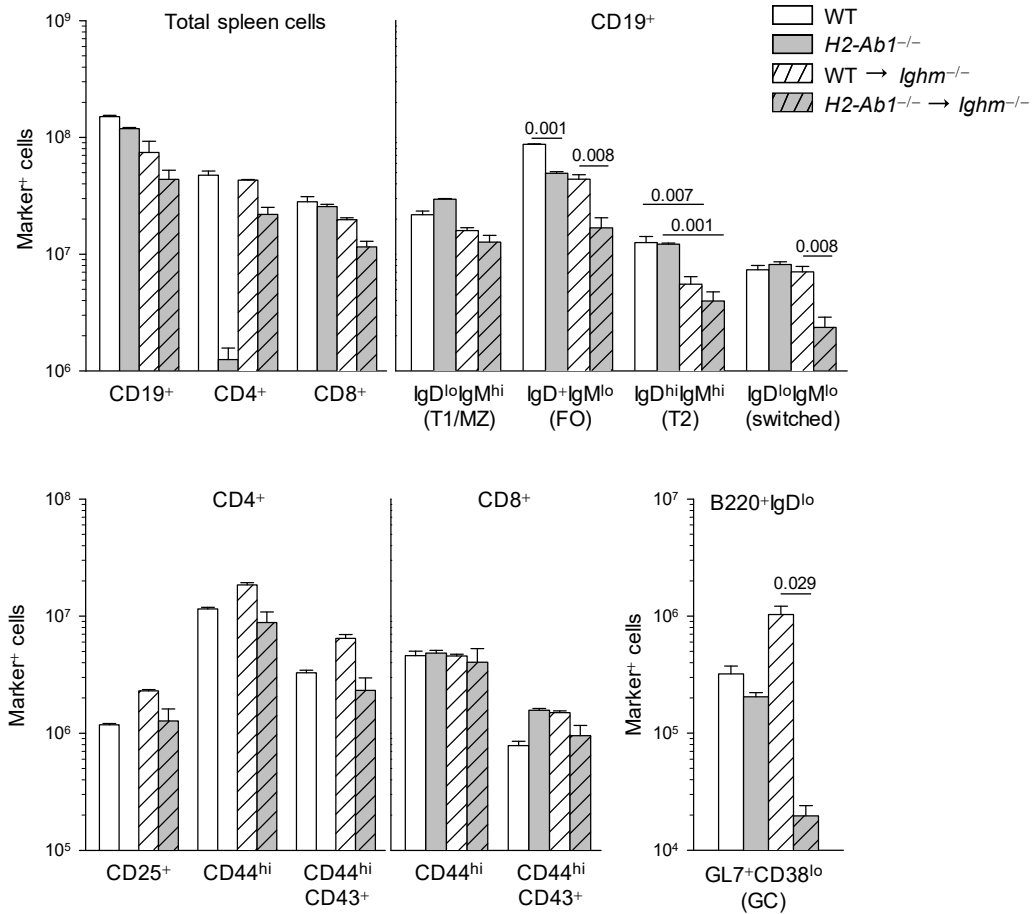

**Supplementary Figure 3. Lymphocyte reconstitution in non-irradiated bone marrow chimeras.** Total numbers of the indicated lymphocyte subsets in spleens of non-irradiated *Ighm*<sup>-/-</sup> recipients of MHC class II-sufficient (WT → *Ighm*<sup>-/-</sup>) or -deficient bone marrow (*H2-Ab1*<sup>-/-</sup> → *Ighm*<sup>-/-</sup>), 8 weeks and non-reconstituted WT and *H2-Ab1*<sup>-/-</sup> donor mice. Data are the means (±SEM) (n=3-4). T1/MZ, transitional 1/marginal zone; FO, follicular; T2, transitional 2; GC, germinal center.

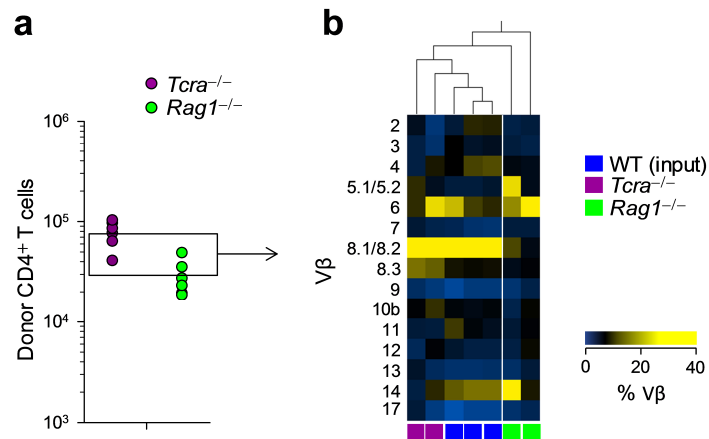

**Supplementary Figure 4. TCR repertoire skewing in T cell-reconstituted *Rag1*<sup>-/-</sup> hosts independently of the extent of reconstitution.** (a) Numbers of donor CD4<sup>+</sup> T cells 21 days after reconstitution of *Tcra*<sup>-/-</sup> or *Rag1*<sup>-/-</sup> *Emv2*<sup>-/-</sup> recipients with purified WT CD4<sup>+</sup> T cells. Each symbol is an individual mouse. Mice selected for comparable T cell reconstitution (rectangle) were then analyzed for Vβ usage. (b) Heat-map of hierarchically-clustered WT donors and *Tcra*<sup>-/-</sup> or *Rag1*<sup>-/-</sup> *Emv2*<sup>-/-</sup> recipients from (a), according to the frequency of the indicated Vβ family before (WT (input)) or 21 days after T cell reconstitution (*Tcra*<sup>-/-</sup> or *Rag1*<sup>-/-</sup>). Each column is an individual mouse.

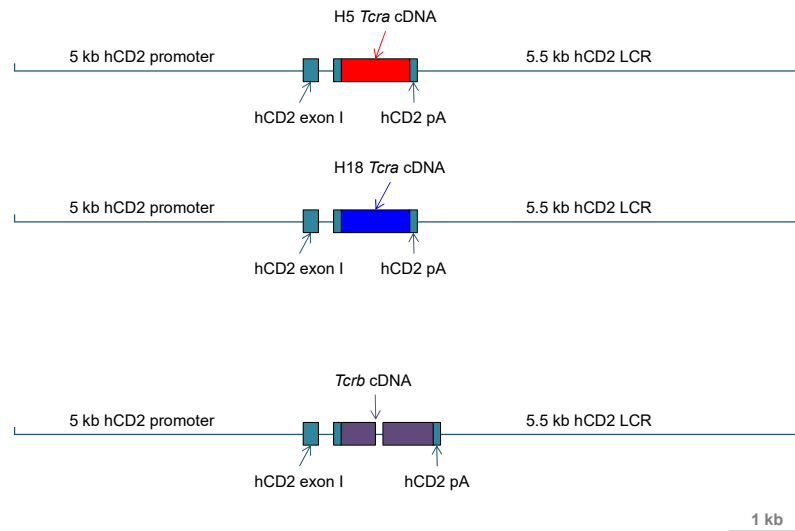

**Supplementary Figure 5. TCR constructs used for the generation of EV $\alpha$ 2 and EV $\alpha$ 3 mice.** The H5 and H18 env-specific CD4<sup>+</sup> T cell clones from the polyclonal repertoire of EF4.1 mice were used for cloning of the *Tcrα* cDNAs used to create EV $\alpha$ 2 and EV $\alpha$ 3 mice, respectively. Each of these were cloned into the hCD2-VA expression cassette, which encompasses a 5 kb human CD2 promoter region, the first exon (with mutated ATG) and intron of the human CD2 gene and a 5.5 kb locus control region, at the 3' end of the gene, which is necessary for appropriate expression in T cells. A similar construct with the *Tcrβ* cDNA from the original EF4.1 mice was also used (bottom). *Tcrα* and *Tcrβ* constructs were co-injected to produce founder mice, genotyped by Transnetyx (Cordova, TN 38016, United States). Correct expression and function of the transgenes was verified by data shown in Fig. 2e and Supplementary Fig. 2.

**Supplementary Table 1. Antibodies used in this study.**

| <b>Antibody</b>             | <b>Vendor</b>   | <b>Clone</b> | <b>Catalogue no.</b> | <b>Dilution</b> |
|-----------------------------|-----------------|--------------|----------------------|-----------------|
| CD25 APC                    | eBioscience     | pc61.5       | 17-0251-82           | 1/200           |
| CD38 APC                    | eBioscience     | 90           | 17-0381-82           | 1/200           |
| CD4 APC                     | eBioscience     | GK1.5        | 12-0041-82           | 1/200           |
| CD4 FITC                    | Insight Biotech | RM4-5        | 11-0042-82           | 1/200           |
| CD4 PE                      | eBioscience     | GK1.5        | 12-0041-85           | 1/300           |
| CD4 PE-Cy7                  | eBioscience     | GK1.5        | 25-0041-82           | 1/200           |
| CD43 PE                     | BD Biosciences  | 1B11         | 558762               | 1/500           |
| CD44 Pacific Blue           | Biolegend       | IM7          | 103020               | 1/200           |
| CD44 V500                   | BD Biosciences  | IM7          | 560780               | 1/200           |
| CD45.1 eFluor® 450          | eBioscience     | A20          | 48-0453-82           | 1/200           |
| CD45.1 PE                   | eBioscience     | A20          | 12-0453-83           | 1/200           |
| CD45.2 APC-Cy7              | Biolegend       | 104          | 109824               | 1/200           |
| CD45.2 APC-eFluor® 780      | eBioscience     | 104          | 47-0454-82           | 1/200           |
| CD45R (B220) PE-TR          | Invitrogen      | RA3-6B2      | RM2617               | 1/300           |
| CD5 PE                      | eBioscience     | 53-7.3       | 12-0051-83           | 1/1000          |
| CD69 FITC                   | eBioscience     | H1.2F3       | 11-0691-85           | 1/200           |
| CD8a FITC                   | eBioscience     | 53-6.7       | 11-0081-85           | 1/600           |
| GL7 FITC                    | BD Biosciences  | GL7          | 553666               | 1/200           |
| IgD PE                      | eBioscience     | 11-26c       | 557359               | 1/200           |
| Ly-6C Biotin                | eBioscience     | AL-21        | 557359               | 1/300           |
| MHC Class II (I-A/I-E) FITC | eBioscience     | M5/114.15.2  | 11-5321-85           | 1/300           |
| TCR beta APC-eFluor® 780    | eBioscience     | H57-597      | 47-5961-82           | 1/200           |
| TCRb APC                    | eBioscience     | H57-597      | 17-5961-81           | 1/200           |
| TCRb APC-Cy7                | eBioscience     | H57-597      | 10-5961-82           | 1/200           |
| Va 3.2 FITC                 | eBioscience     | RR3-16       | 553219               | 1/200           |
| Va 3.2b,c TCR FITC          | BD Biosciences  | RR3-16       | 553219               | 1/200           |
| Va2 TCR FITC                | BD Biosciences  | B20.1        | 553288               | 1/200           |
| Vb TCR Screening Panel      | BD Biosciences  | Vb various   | 557004               | 1/300           |
| Vα2 TCR APC                 | eBioscience     | b20.1        | 17-5812-82           | 1/200           |
